# Supplementary material for: SARS-CoV-2 seroprevalence and implications for population immunity: Evidence from two Health and Demographic Surveillance System sites in Kenya, February-June 2022
Source: bioRxiv or medRxiv preprint supplement (doi:10.1101/2022.10.10.22280824), 2022-10-24
Supplement: Supplementary file [file media-1.pdf]

## **SUPPLEMENT**

**Title: SARS-CoV-2 seroprevalence and implications for population immunity:  
Evidence from two Health and Demographic Surveillance System sites in  
Kenya, February – June 2022**

**Table S1.** Participant characteristics by site

| Characteristic                                         | Kilifi HDSS |     |                    | Nairobi Urban HDSS |     |                    |
|--------------------------------------------------------|-------------|-----|--------------------|--------------------|-----|--------------------|
|                                                        | N           | n   | %                  | N                  | n   | %                  |
| <b>Sex</b>                                             |             |     |                    |                    |     |                    |
| Female                                                 | 852         | 468 | 54.9               | 851                | 404 | 47.5               |
| Male                                                   | 852         | 384 | 45.1               | 851                | 447 | 52.5               |
| <b>Age category</b>                                    |             |     |                    |                    |     |                    |
| <16 years                                              | 852         | 313 | 36.7               | 851                | 306 | 36.0               |
| 16-24 years                                            | 852         | 86  | 10.1               | 851                | 94  | 11.0               |
| 25-34 years                                            | 852         | 100 | 11.7               | 851                | 100 | 11.8               |
| 35-44 years                                            | 852         | 100 | 11.7               | 851                | 99  | 11.6               |
| 45-54 years                                            | 852         | 102 | 12.0               | 851                | 101 | 11.9               |
| 55-64 years                                            | 852         | 101 | 11.9               | 851                | 100 | 11.8               |
| >=65 years                                             | 852         | 50  | 5.9                | 851                | 51  | 6.0                |
| <b>COVID vaccination coverage*</b>                     |             |     |                    |                    |     |                    |
| >=1 doses, all ages                                    | 852         | 94  | 11.0 (9.0 – 13.3)  | 851                | 284 | 33.4 (30.2 – 36.6) |
| >=1 doses, >=15 years                                  | 559         | 94  | 16.8 (13.8 – 20.2) | 563                | 284 | 50.4 (46.2 – 54.6) |
| Full vaccination, >=15 years                           | 559         | 55  | 9.8 (7.5 – 12.6)   | 563                | 211 | 37.5 (33.5 – 41.6) |
| <b>History of COVID-like symptoms</b>                  |             |     |                    |                    |     |                    |
| >=1 symptoms in the 2 weeks prior to sample collection | 852         | 177 | 20.8               | 851                | 414 | 48.6               |
| Symptoms resulting in hospitalization                  | 177         | 3   | 1.7                | 414                | 6   | 1.4                |
| <b>Ever confirmed COVID</b>                            | 852         | 4   | 0.5                | 851                | 18  | 2.1                |

\*95% confidence intervals indicated in parenthesis

**Table S2.** Proportion of individuals with anti-S IgG concentrations  $\geq 154$  BAU/mL by site, sex, age category and COVID vaccination status, and p-values for stratum-specific tests of equality of anti-S concentration distributions.

| <b>KILIFI HDSS</b>            | <b>Sample size</b> | <b>n with anti-S IgG <math>\geq 154</math> BAU/mL</b> | <b>Crude proportion with anti-S IgG <math>\geq 154</math> BAU/mL</b> | <b>p-value (equality of distributions test)</b> |
|-------------------------------|--------------------|-------------------------------------------------------|----------------------------------------------------------------------|-------------------------------------------------|
| <b>Overall</b>                | 852                | 534                                                   | 62.6                                                                 | Ref                                             |
| <b>Sex</b>                    |                    |                                                       |                                                                      |                                                 |
| Female                        | 468                | 232                                                   | 60.4                                                                 | Ref                                             |
| Male                          | 384                | 301                                                   | 64.3                                                                 | 0.104                                           |
| <b>Age category</b>           |                    |                                                       |                                                                      |                                                 |
| <16 years                     | 313                | 169                                                   | 54.0                                                                 | Ref                                             |
| 16-24 years                   | 86                 | 58                                                    | 67.4                                                                 | 0.002                                           |
| 25-34 years                   | 100                | 67                                                    | 67.0                                                                 | <0.001                                          |
| 35-44 years                   | 100                | 67                                                    | 67.0                                                                 | <0.001                                          |
| 45-54 years                   | 102                | 71                                                    | 69.6                                                                 | 0.007                                           |
| 55-64 years                   | 101                | 66                                                    | 65.3                                                                 | <0.001                                          |
| $\geq 65$ years               | 50                 | 35                                                    | 70.0                                                                 | 0.063                                           |
| <b>COVID vaccination</b>      |                    |                                                       |                                                                      |                                                 |
| Unvaccinated, $\geq 15$ years | 465                | 293                                                   | 63.0                                                                 | Ref                                             |
| Vaccinated, $\geq 15$ years   | 94                 | 88                                                    | 93.6                                                                 | <0.001                                          |
| <b>NAIROBI URBAN HDSS</b>     | <b>Sample size</b> | <b>n with anti-S IgG <math>\geq 154</math> BAU/mL</b> | <b>Crude proportion with anti-S IgG <math>\geq 154</math> BAU/mL</b> | <b>p-value (equality of distributions test)</b> |

|                          |     |     |      |         |
|--------------------------|-----|-----|------|---------|
| <b>Overall</b>           | 851 | 731 | 85.8 | <0.001* |
| <b>Sex</b>               |     |     |      |         |
| Female                   | 404 | 373 | 83.4 | Ref     |
| Male                     | 447 | 357 | 88.4 | 0.013   |
| <b>Age category</b>      |     |     |      |         |
| <16 years                | 306 | 236 | 77.1 | Ref     |
| 16-24 years              | 94  | 84  | 89.4 | <0.001  |
| 25-34 years              | 100 | 84  | 84.0 | <0.001  |
| 35-44 years              | 99  | 93  | 93.9 | <0.001  |
| 45-54 years              | 101 | 95  | 94.1 | <0.001  |
| 55-64 years              | 100 | 93  | 93.0 | <0.001  |
| ≥65 years                | 51  | 45  | 88.2 | <0.001  |
| <b>COVID vaccination</b> |     |     |      |         |
| Unvaccinated, ≥15 years  | 279 | 238 | 85.3 | Ref     |
| Vaccinated, ≥15 years    | 284 | 272 | 95.8 | <0.001  |

\*p-value for test of equality of distribution of anti-S IgG concentration cumulative distribution functions at the Kilifi HDSS (ref) vs the Nairobi Urban HDSS, overall.

**Table S3.** Test-adjusted **anti-S IgG** seroprevalence (last column) among **COVID-unvaccinated** participants.

| <b>KILIFI HDSS</b>        | <b>Sample size</b> | <b>Seropositive</b> | <b>Bayesian population-weighted seroprevalence (95% CrI)</b> | <b>Bayesian population-weighted, test-adjusted seroprevalence (95% CrI)</b> |
|---------------------------|--------------------|---------------------|--------------------------------------------------------------|-----------------------------------------------------------------------------|
| Overall                   | 758                | 508                 | 66.7 (63.3-70.0)                                             | 72.4 (67.6-77.8)                                                            |
| <b>Sex</b>                |                    |                     |                                                              |                                                                             |
| Female                    | 422                | 293                 | 69.3 (64.7-73.7)                                             | 75.2 (69.3-81.4)                                                            |
| Male                      | 336                | 215                 | 63.8 (58.6-68.7)                                             | 69.3 (62.8-76.0)                                                            |
| <b>Age category</b>       |                    |                     |                                                              |                                                                             |
| <16 years                 | 312                | 194                 | 64.4 (59.1-69.0)                                             | 69.9 (63.3-76.4)                                                            |
| 16-24 years               | 74                 | 53                  | 68.8 (62.5-76.0)                                             | 74.7 (67.2-83.5)                                                            |
| 25-34 years               | 86                 | 59                  | 68.1 (61.6-75.0)                                             | 74.0 (66.5-82.0)                                                            |
| 35-44 years               | 88                 | 63                  | 69.2 (63.1-76.1)                                             | 75.1 (67.7-83.6)                                                            |
| 45-54 years               | 81                 | 58                  | 69.1 (62.8-76.3)                                             | 74.8 (67.4-83.3)                                                            |
| 55-64 years               | 75                 | 51                  | 68.0 (61.1-74.6)                                             | 73.8 (65.8-81.9)                                                            |
| ≥65 years                 | 42                 | 30                  | 68.9 (61.7-77.0)                                             | 74.6 (66.3-84.0)                                                            |
| <b>NAIROBI URBAN HDSS</b> | <b>Sample size</b> | <b>Seropositive</b> | <b>Bayesian population-weighted seroprevalence (95% CrI)</b> | <b>Bayesian population-weighted, test-adjusted seroprevalence (95% CrI)</b> |
| Overall                   | 567                | 479                 | 85.3 (82.1-88.2)                                             | 93.8 (88.2-99.7)                                                            |
| <b>Sex</b>                |                    |                     |                                                              |                                                                             |
| Female                    | 283                | 248                 | 88.5 (84.5-92.0)                                             | 97.4 (91.1-100)                                                             |
| Male                      | 284                | 231                 | 82.5 (77.8-86.7)                                             | 90.6 (84.0-99.9)                                                            |
| <b>Age category</b>       |                    |                     |                                                              |                                                                             |
| <16 years                 | 300                | 242                 | 81.4 (76.8-85.5)                                             | 91.7 (83.7-99.7)                                                            |
| 16-24 years               | 60                 | 52                  | 86.8 (79.7-92.7)                                             | 95.4 (88.2-99.8)                                                            |
| 25-34 years               | 65                 | 55                  | 85.8 (78.7-91.8)                                             | 94.0 (86.2-99.8)                                                            |
| 35-44 years               | 48                 | 45                  | 89.7 (82.5-95.9)                                             | 95.6 (89.2-99.8)                                                            |
| 45-54 years               | 40                 | 35                  | 86.3 (77.7-93.3)                                             | 93.9 (85.3-99.8)                                                            |
| 55-64 years               | 39                 | 38                  | 90.5 (82.8-97.1)                                             | 95.4 (88.8-99.8)                                                            |
| ≥65 years                 | 15                 | 12                  | 84.7 (72.0-93.2)                                             | 94.2 (84.3-99.8)                                                            |

---

**Figure S1.** Population density map showing the geographical location of study sites within Kenya. Dots represent 100 population.

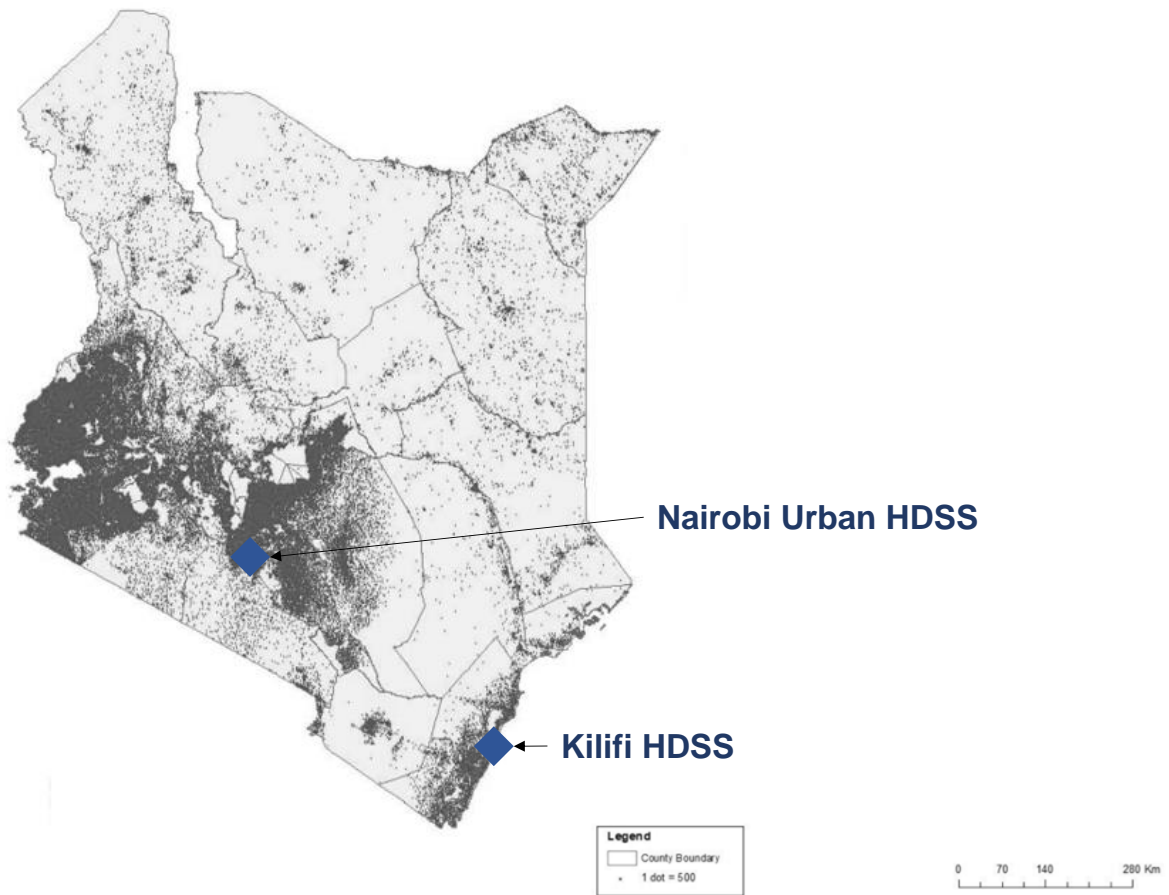

**Figure S2.** Site-specific enrolment periods overlaid on daily number of confirmed cases

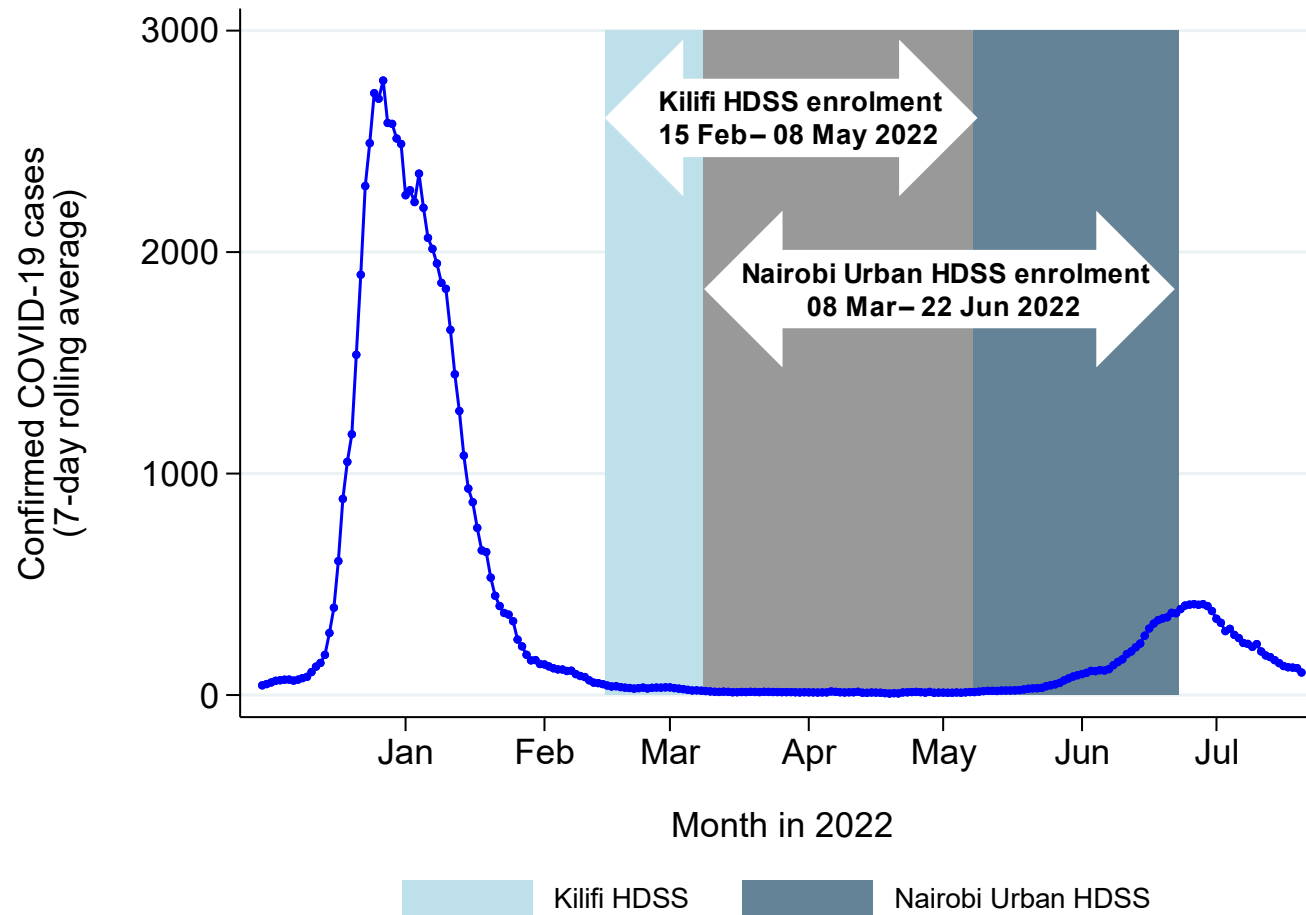



**Figure S3.** Frequency of COVID-like symptoms within the two weeks prior to sample collection overall.

**A. KILIFI HDSS**

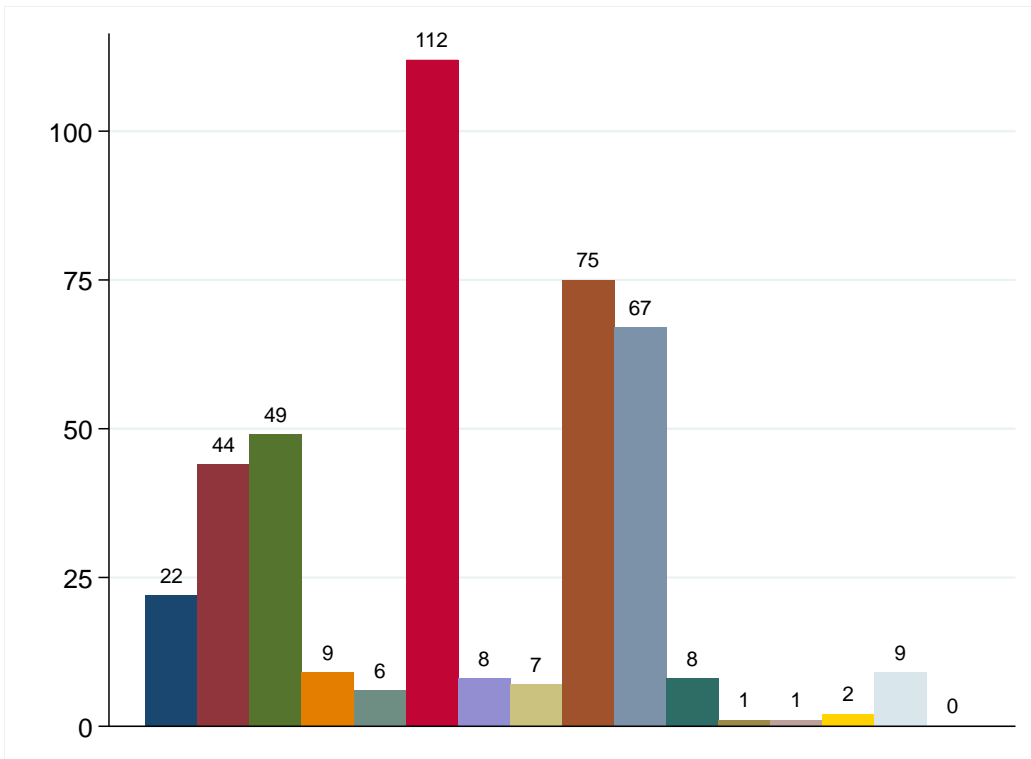

**B. NAIROBI URBAN HDSS**

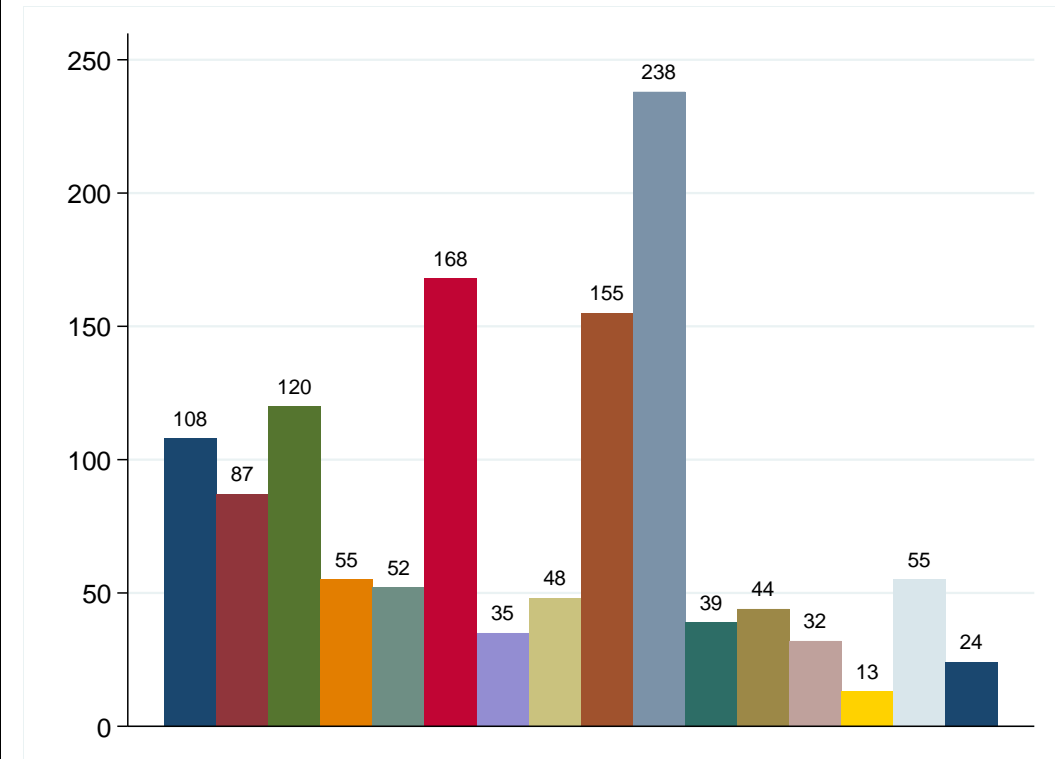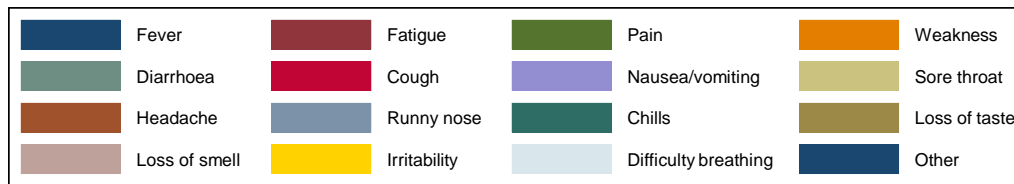

**Figure S4.** Frequency of COVID-like symptoms within the two weeks prior to sample collection by age category.

**A. KILIFI HDSS**

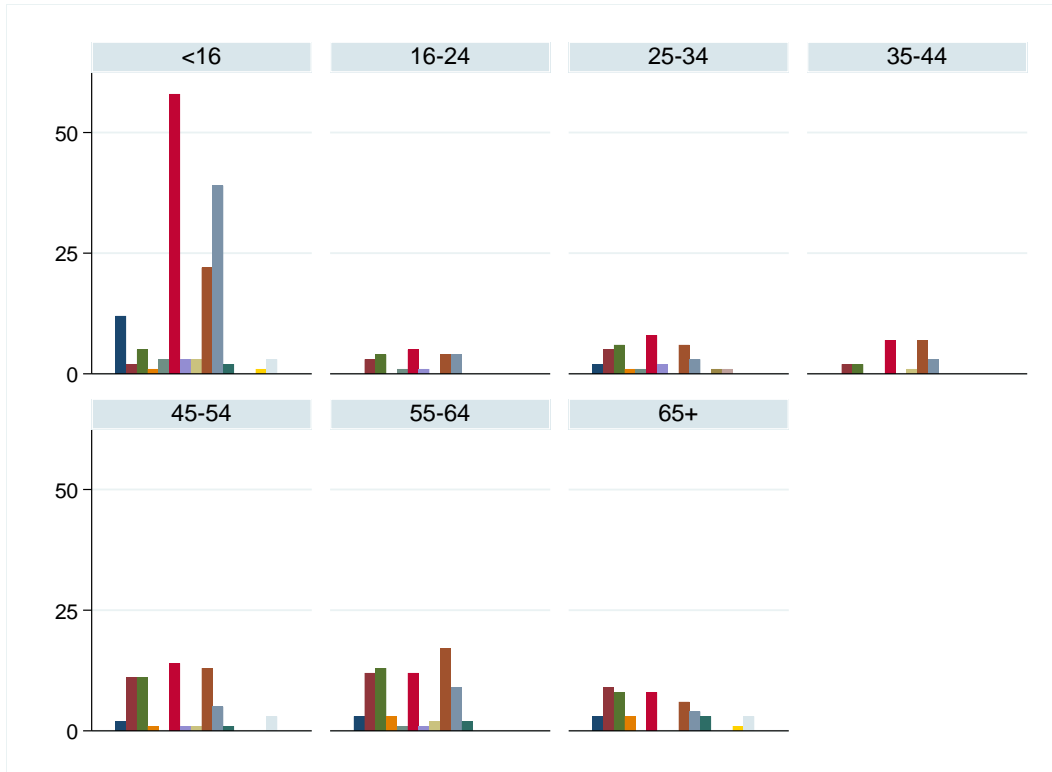

**B. NAIROBI URBAN HDSS**

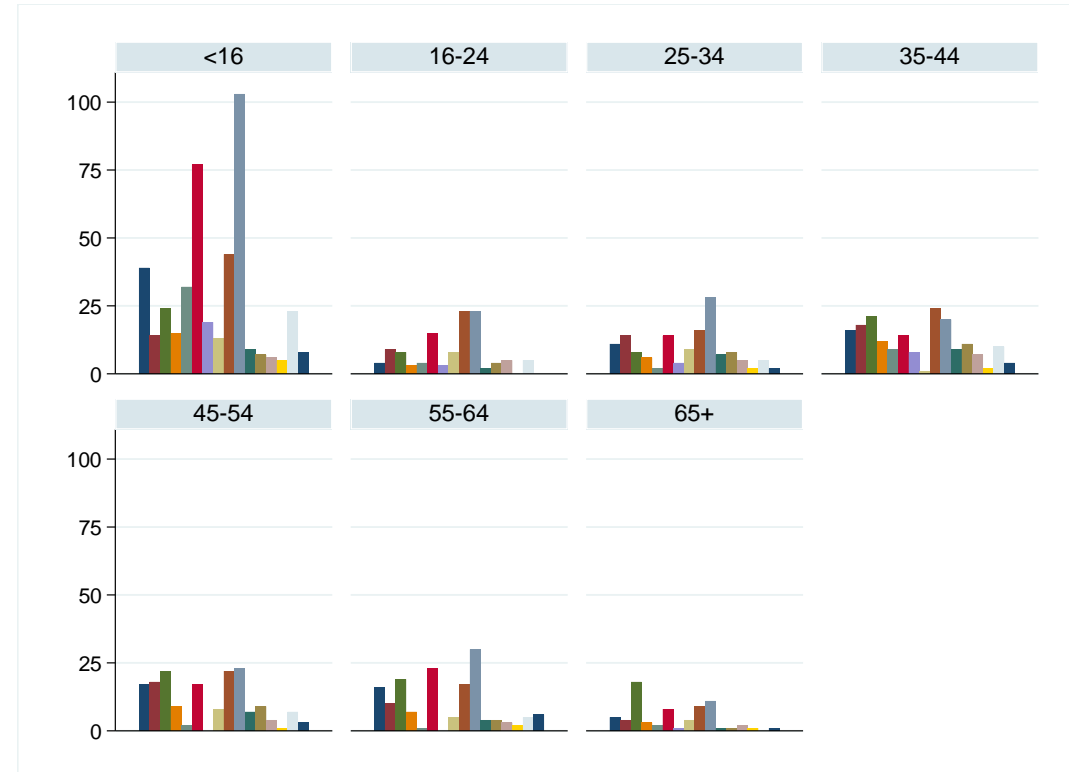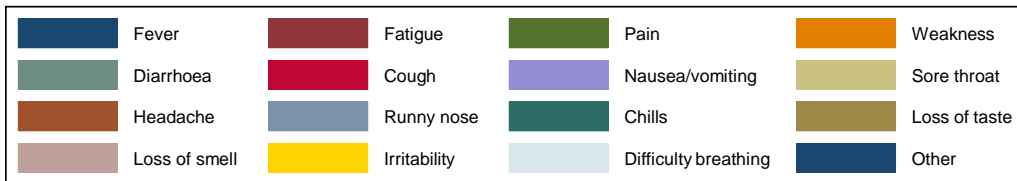

**Figure S5.** Reverse cumulative distribution curves of anti-S IgG concentrations within the Kilifi HDSS and Nairobi Urban HDSS by sex (A,D), by age category (B, E) and by COVID vaccination status among individuals aged  $\geq 15$  years (C, F). The red vertical line represents an antibody concentration of 154 BAU/mL.

**Kilifi HDSS**

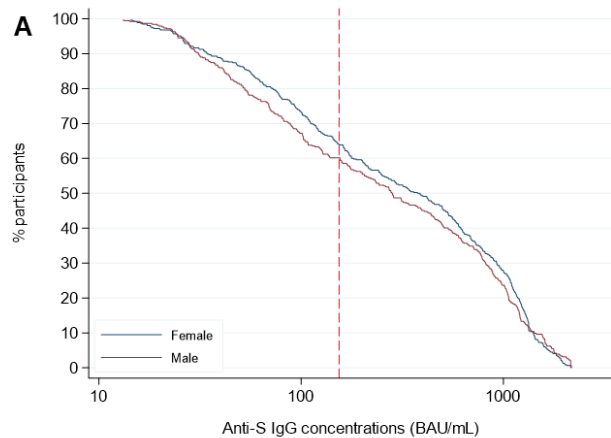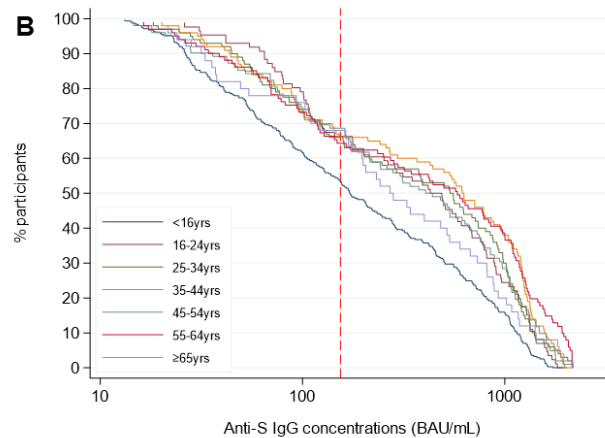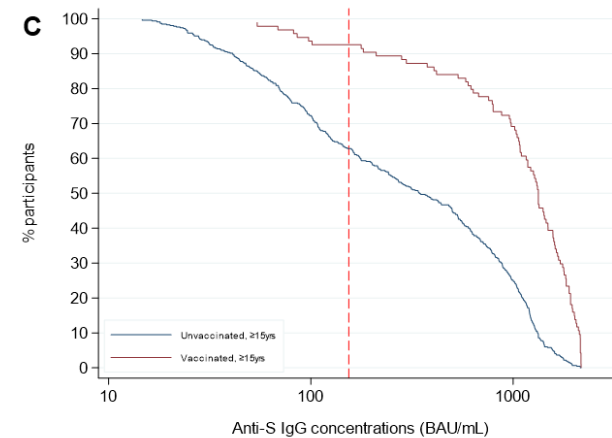

**Nairobi Urban HDSS**

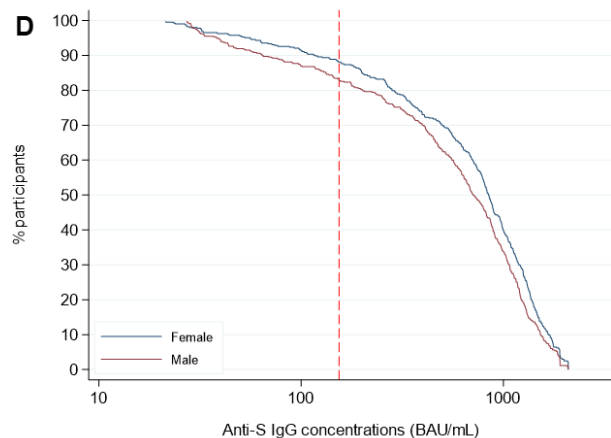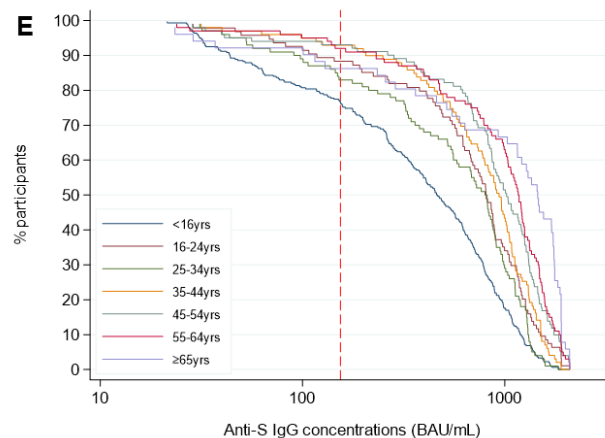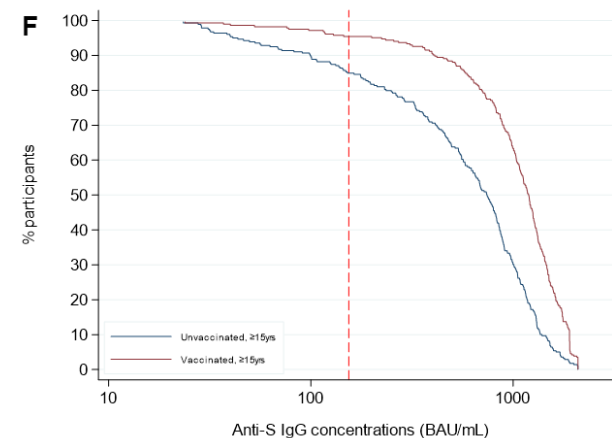

### Study data collection form

|                                                                       |                                                                                                           |                                                                                                                                                                                              |
|-----------------------------------------------------------------------|-----------------------------------------------------------------------------------------------------------|----------------------------------------------------------------------------------------------------------------------------------------------------------------------------------------------|
| <b>Study:</b> S-COV-2 HDSS sero-surveys                               | <b>1. Location (LOC):</b><br><input type="checkbox"/> KILIFI- KLF<br><input type="checkbox"/> NAIROBI-NRB | <b>2.1 Participant PID:</b> _____<br><b>2.2 Participant ID:</b> (SS-        -                    )<br><div style="text-align: right; margin-right: 20px;">LOC                      S/N</div> |
| <b>3. Date of visit (DD/MMM/YYYY):</b>  _ _ _ / _ _ _ _ _ / _ _ _ _ _ |                                                                                                           | <b>4. Staff initials:</b>  _ _ _ _                                                                                                                                                           |

|           |                                                                                                                                                                    |                                                                                                                                                                                                                                                                                                                                                                                                                                                                     |
|-----------|--------------------------------------------------------------------------------------------------------------------------------------------------------------------|---------------------------------------------------------------------------------------------------------------------------------------------------------------------------------------------------------------------------------------------------------------------------------------------------------------------------------------------------------------------------------------------------------------------------------------------------------------------|
| <b>5.</b> | <b>5.1 Residency status:</b><br>a. Present<br>b. Not at Home<br>c. Await Husband Decision<br>d. Guardian Not Present<br>e. Out Migrated<br>f. Died<br>g. Not Known | <b>5.2 Consent:</b>  _  (0= No , 1=Yes, 2=Withdrawn)<br><b>5.3 If Consent is NO/Withdrawn: Reason why refused/Withdrawn to participate .</b><br>a. Parent/Guardian refused consent for the study<br>b. Mother needs the father to give consent and the father is away<br>c. Fear of blood/Swab<br>d. Not interested in the research<br>e. Negative attitude towards KEMRI/ APHRC and KEMRI / APHRC activities<br>f. Prior experience with KEMRI/ APHRC<br>g. Others |
| <b>6.</b> | <b>6.1 First name:</b> _____<br><b>6.2 Middle name:</b> _____<br><b>6.3 Surname:</b> _____                                                                         | <b>6.4 Education:</b>  _  (Fill 0=No formal education; 1=Incomplete primary; 2= Complete primary, 3=Incomplete secondary; 4=Complete secondary; 5= Post secondary)<br><b>6.5 Religion:</b>  _  (0=None, 1= Muslim 2= Catholic, 3=Protestant; 4= Other Christians, 5= Traditional religion, 6=Hindu, 7=Other(specify).....)                                                                                                                                          |
| <b>7.</b> | <b>7.1 Estimated age in years:</b>  _ _ _                                                                                                                          | <b>7.2 if &lt;5 years, DOB</b>  _ _ _ / _ _ _ / _ _  (dd/MMM/yy)                                                                                                                                                                                                                                                                                                                                                                                                    |
| <b>8.</b> | Sex at birth:                                                                                                                                                      | _  (Fill in 0= Female , 1=Male, 2=Other)                                                                                                                                                                                                                                                                                                                                                                                                                            |
| <b>9.</b> | Usual place of residence ( <b><u>NOT</u> ancestral home</b> )                                                                                                      |                                                                                                                                                                                                                                                                                                                                                                                                                                                                     |
|           | <b>9.1 County:</b> _____<br><b>9.2 Sub-county:</b> _____<br><b>9.3 Division:</b> _____                                                                             | <b>9.4 Location:</b> _____<br><b>9.5 Sub-location:</b> _____<br><b>9.6 Village/estate:</b> _____                                                                                                                                                                                                                                                                                                                                                                    |

|                                                                                                                                                 |                                                                                                                                                                                                                                                                                                                                                                                                                                                                                                                                                                                                                                                                                                                                                                                                                                                                               |                                                                                                                                                                                                                                                                                                                                                                                                                                                                                                                                                                                                                                                                                                                                                                                                                                                                                                                                                                                                                                                                                                                                                                                                                                                                                                                                                                                                                                                                                                                                                                                                                                                                            |
|-------------------------------------------------------------------------------------------------------------------------------------------------|-------------------------------------------------------------------------------------------------------------------------------------------------------------------------------------------------------------------------------------------------------------------------------------------------------------------------------------------------------------------------------------------------------------------------------------------------------------------------------------------------------------------------------------------------------------------------------------------------------------------------------------------------------------------------------------------------------------------------------------------------------------------------------------------------------------------------------------------------------------------------------|----------------------------------------------------------------------------------------------------------------------------------------------------------------------------------------------------------------------------------------------------------------------------------------------------------------------------------------------------------------------------------------------------------------------------------------------------------------------------------------------------------------------------------------------------------------------------------------------------------------------------------------------------------------------------------------------------------------------------------------------------------------------------------------------------------------------------------------------------------------------------------------------------------------------------------------------------------------------------------------------------------------------------------------------------------------------------------------------------------------------------------------------------------------------------------------------------------------------------------------------------------------------------------------------------------------------------------------------------------------------------------------------------------------------------------------------------------------------------------------------------------------------------------------------------------------------------------------------------------------------------------------------------------------------------|
| <p><b>10.0</b></p>                                                                                                                              | <p><b>10.1 In the past 3 months, have you experienced any of the following</b> (check all reported symptoms):</p> <p><input type="checkbox"/> History of fever : __  <b>0= No ; 1=Yes</b></p> <p><input type="checkbox"/> Chills : __  <b>0= No ; 1=Yes</b></p> <p><input type="checkbox"/> General weakness</p> <p><input type="checkbox"/> Cough: __  <b>0= No ; 1=Yes</b></p> <p><input type="checkbox"/> Sore throat: __  <b>0= No ; 1=Yes</b></p> <p><input type="checkbox"/> Congestion/Runny nose: __  <b>0= No ; 1=Yes</b></p> <p><input type="checkbox"/> Fatigue: __  <b>0= No ; 1=Yes-</b></p> <p><input type="checkbox"/> New loss of taste : __  <b>0= No ; 1=Yes</b></p> <p><input type="checkbox"/> New loss of smell : __  <b>0= No ; 1=Yes</b></p> <p><input type="checkbox"/> Pain (check all that apply): ( )Muscular; ( )Chest; ( )Abdominal ( )Joint</p> | <p><input type="checkbox"/> Shortness of breath/difficulty breathing</p> <p><input type="checkbox"/> Diarrhoea: __  <b>0= No ; 1=Yes</b></p> <p><input type="checkbox"/> Nausea/vomiting: __  <b>0= No ; 1=Yes</b></p> <p><input type="checkbox"/> Headache: __  <b>0= No ; 1=Yes</b></p> <p><input type="checkbox"/> Irritability/Confusion : __  <b>0= No ; 1=Yes</b></p> <p><input type="checkbox"/> UNKNOWN (all)</p> <p><input type="checkbox"/> Other, specify</p> <p><input type="checkbox"/> NO SYMPTOMS</p> <p><input type="checkbox"/> Pain (check all that apply) ( ) Muscular ( ) Chest ( ) Abdominal ( ) Joint</p>                                                                                                                                                                                                                                                                                                                                                                                                                                                                                                                                                                                                                                                                                                                                                                                                                                                                                                                                                                                                                                            |
| <p><b>10.1</b> Which of the above symptoms(Q10.1) have you experienced in the <b>last 2 weeks:</b>{ } <b>Choose all that apply from Q10</b></p> |                                                                                                                                                                                                                                                                                                                                                                                                                                                                                                                                                                                                                                                                                                                                                                                                                                                                               |                                                                                                                                                                                                                                                                                                                                                                                                                                                                                                                                                                                                                                                                                                                                                                                                                                                                                                                                                                                                                                                                                                                                                                                                                                                                                                                                                                                                                                                                                                                                                                                                                                                                            |
| <p><b>11.</b></p>                                                                                                                               | <p>If you answered yes, Q10,</p>                                                                                                                                                                                                                                                                                                                                                                                                                                                                                                                                                                                                                                                                                                                                                                                                                                              | <p><b>11.1</b> Did any of these symptoms require you to seek medical attention?<br/> __  (Fill in 0= No , 1=Yes, 2= Don't know)</p> <p><b>11.2</b> Did any of these symptoms cause you to miss work?<br/> __  (Fill in 0= No , 1=Yes, 2= Don't know)</p> <p><b>11.3</b> Did any of these symptoms require you to be hospitalised?<br/> __  (Fill in 0= No , 1=Yes, 2= Don't know)</p>                                                                                                                                                                                                                                                                                                                                                                                                                                                                                                                                                                                                                                                                                                                                                                                                                                                                                                                                                                                                                                                                                                                                                                                                                                                                                      |
| <p><b>12.</b></p>                                                                                                                               | <p>COVID-19 vaccination status</p>                                                                                                                                                                                                                                                                                                                                                                                                                                                                                                                                                                                                                                                                                                                                                                                                                                            | <p><b>12.1</b> Have you had a COVID-19 vaccine?  __  (Fill in 0= No , 1=Yes, 2= Don't know)</p> <p>COVID vaccine type? (1 – AstraZeneca, 2 – Pfizer, 3- Johnson &amp; Johnson, 4 -Moderna, 5 - SputnikV, 6-Sinopharm ; 7- Others.....(Type), 8=Don't Know)</p> <p><b>12.2</b> How many doses?  __  (1 dose=1, 2 doses =2, 3 doses-3)<br/> a) <b>Dose 1 type:</b>  __  date  _d_ _d_ / _m_ _m_ _m_ / _y_ _y_ <br/> b) <b>Dose 2 type:</b>  __  date  _d_ _d_ / _m_ _m_ _m_ / _y_ _y_ <br/> c) <b>Dose 3 type:</b>  __  date  _d_ _d_ / _m_ _m_ _m_ / _y_ _y_ </p> <p><b>12.3 Vaccination confirmed by:</b>  __  <b>1=Vaccination Card; 2= SMS; 3= Verbal report; 4=Other(specify).....</b></p>                                                                                                                                                                                                                                                                                                                                                                                                                                                                                                                                                                                                                                                                                                                                                                                                                                                                                                                                                                              |
| <p><b>13.</b></p>                                                                                                                               | <p>Check for BCG scar (first look at the left, then the right shoulder)</p>                                                                                                                                                                                                                                                                                                                                                                                                                                                                                                                                                                                                                                                                                                                                                                                                   | <p><b>13.1</b> Does the participant have a BCG scar?  __  (Fill in 0= No , 1=Yes, 2= Don't know)</p>                                                                                                                                                                                                                                                                                                                                                                                                                                                                                                                                                                                                                                                                                                                                                                                                                                                                                                                                                                                                                                                                                                                                                                                                                                                                                                                                                                                                                                                                                                                                                                       |
| <p><b>14.</b></p>                                                                                                                               | <p>For children &lt; 5 years, vaccination information from health card</p>                                                                                                                                                                                                                                                                                                                                                                                                                                                                                                                                                                                                                                                                                                                                                                                                    | <p><b>14.1</b> Do you have vaccination records for (<i>child's Name</i>)?  __  (Fill in 0= No , 1=Yes)<br/>If you answered YES, in 20.1, <i>Capture Vaccination history from the records provided</i> (Fill in 0= No , 1=Yes, 2= Don't know)</p> <p><b>14.2</b> BCG  __  if yes, fill in date  _d_ _d_ / _m_ _m_ _m_ / _y_ _y_ </p> <p><b>14.3</b> Penta 1  __  if yes, fill in date  _d_ _d_ / _m_ _m_ _m_ / _y_ _y_ </p> <p><b>14.4</b> Penta 2  __  if yes, fill in date  _d_ _d_ / _m_ _m_ _m_ / _y_ _y_ </p> <p><b>14.5</b> Penta 3  __  if yes, fill in date  _d_ _d_ / _m_ _m_ _m_ / _y_ _y_ </p> <p><b>14.6</b> PCV 1  __  if yes, fill in date  _d_ _d_ / _m_ _m_ _m_ / _y_ _y_ </p> <p><b>14.7</b> PCV 2  __  if yes, fill in date  _d_ _d_ / _m_ _m_ _m_ / _y_ _y_ </p> <p><b>14.8</b> PCV 3  __  if yes, fill in date  _d_ _d_ / _m_ _m_ _m_ / _y_ _y_ </p> <p><b>14.9</b> MCV1  __  if yes, fill in date  _d_ _d_ / _m_ _m_ _m_ / _y_ _y_ </p> <p><b>14.10</b> MCV2  __  if yes, fill in date  _d_ _d_ / _m_ _m_ _m_ / _y_ _y_ </p> <p>If you answered NO, in 20.1,</p> <p><b>14.11</b> Reason why vaccination card is not available.  __ <br/>(Choose from the List of probable reasons why no records provided )</p> <ol style="list-style-type: none"> <li>1. Mother/guardian who keeps the card is not available</li> <li>2. Claims to have had a card but misplaced it</li> <li>3. Was not issued with the card at the health facility but received vaccinations</li> <li>4. Has never gotten a card and never received vaccinations</li> <li>5. Card Destroyed/burnt</li> <li>6. Card left at another place other than the current residence</li> </ol> |
| <p><b>15</b></p>                                                                                                                                | <p>Have you ever tested for COVID?)?<br/> __  (Fill in 0= No , 1=Yes)</p>                                                                                                                                                                                                                                                                                                                                                                                                                                                                                                                                                                                                                                                                                                                                                                                                     | <p>If Positive , Date of last positive test  _d_ _d_ _m_ _m_ / _y_ _y_ </p>                                                                                                                                                                                                                                                                                                                                                                                                                                                                                                                                                                                                                                                                                                                                                                                                                                                                                                                                                                                                                                                                                                                                                                                                                                                                                                                                                                                                                                                                                                                                                                                                |

|            |                                               |                                         |
|------------|-----------------------------------------------|-----------------------------------------|
|            |                                               |                                         |
| <b>16.</b> | Time of sample collection (hh:mm; 24hr clock) | _____:____ or  __  N/A sample not taken |

**Form completed by:** \_\_\_\_\_ (Signature) |\_\_|\_|\_|/|\_\_|\_|\_|\_|\_|/|\_2\_|\_0\_|\_|\_|\_| (Date (dd/MMM/yyyy))
